# Supplementary material for: Gut microbiota and metabolomics unveil the mechanisms of Lomatogonium rotatum in ameliorating visceral fat and serum lipids in high-fat diet-induced obese mice
Source: Front Pharmacol. 2024 Nov 4;15:1418063. doi: 10.3389/fphar.2024.1418063 (PMC11570273; doi:10.3389/fphar.2024.1418063)
Supplement: Supplementary file 1 [file Table1.XLSX]

## Sheet: Positive ion mode
Name	Formula	CAS_num	Class	中文分类参考	Molecular Weight(实际值)	RT [min]	Molecular Weight(理论值)	△ppm	Area: 200102-516001-leizhuhua-P.raw (F1)	Relative concentration（ug/ml）
N-Hydroxysuccinimide	C4 H5 N O3	6066-82-6	Pyrrolidines	吡咯烷类	115.027	0.756	115.027	0	1.29969e+06	0.192252
Cytidine	C9 H13 N3 O5	65-46-3	Pyrimidine nucleosides	嘧啶核苷	243.086	0.831	243.086	0	101295	0.0149837
Nicotinic acid	C6 H5 N O2	59-67-6	Pyridines and derivatives	吡啶及其衍生物	123.032	1.129	123.032	-2	218334	0.0322962
Adenosine	C10 H13 N5 O4	58-61-7	Purine nucleosides	嘌呤核苷	267.097	1.233	267.097	0	926154	0.136998
Protopine	C20 H19 N O5	130-86-9	Protopine alkaloids	Protopine 生物碱	353.126	7.1	353.126	0	87452.7	0.0129361
(3aS,4aR,7aS,9bS)-3-Ethyl-2-oxo-3,3a,7a,9b-tetrahydro-2H,4aH-1,4,5-trioxadicyclopenta[a,hi]indene-7-carboxylic acid	C14 H14 O6	NA	Prenol lipids	异戊烯醇酯类脂质化合物	278.079	7.744	278.079	0	209366	0.0309696
(3aR,8R,8aR,9aR)-8-Hydroxy-8a-methyl-3,5-bis(methylene)decahydronaphtho[2,3-b]furan-2(3H)-one	C15 H20 O3	NA	Prenol lipids	异戊烯醇酯类脂质化合物	248.141	6.765	248.141	0	165935	0.0245453
Verrucarol	C15 H22 O4	2198-92-7	Prenol lipids	异戊烯醇酯类脂质化合物	266.152	6.379	266.152	0	45303.2	0.00670131
Geniposidic Acid	C16 H22 O10	27741-01-1	Prenol lipids	异戊烯醇酯类脂质化合物	374.121	5.414	374.121	0	6.63274e+06	0.981123
2-Amino-4-cresol	C7 H9 N O	20734-76-3	Phenols	酚类	123.069	5.945	123.068	-1	29075.2	0.00430084
Vanillin	C8 H8 O3	121-33-5	Phenols	酚类	152.047	6.598	152.047	0	84628.2	0.0125183
2-Methyl-5-propionylfuran	C8 H10 O2	10599-69-6	Organooxygen compounds	有机氧化合物	138.068	5.415	138.068	0	452072	0.066871
7,8-Bis(hydroxymethyl)-1,4a-dimethyl-3,4,4a,5,6,7-hexahydro-2H-benzo[7]annulen-2-one	C15 H22 O3	NA	Organooxygen compounds	有机氧化合物	250.157	7.45	250.157	0	154898	0.0229127
D-Glucosamine	C6 H13 N O5	90-77-7	Organooxygen compounds	有机氧化合物	179.079	0.719	179.079	0	416907	0.0616694
3',4'-Dimethoxyacetophenone	C10 H12 O3	1131-62-0	Organooxygen compounds	有机氧化合物	180.079	6.344	180.079	0	152597	0.0225723
Acetophenone	C8 H8 O	98-86-2	Organooxygen compounds	有机氧化合物	120.058	5.778	120.058	-1	460142	0.0680648
1,2-di-O-methyl-4-[(2R)-2,4-dihydrobutyramido]-4,6-dideoxy-alpha-D-mannopyranoside	C12 H23 N O7	NA	Organooxygen compounds	有机氧化合物	293.147	1.31	293.147	0	1.09352e+06	0.161754
Pantothenate	C9 H17 N O5	79-83-4	Organooxygen compounds	有机氧化合物	219.111	2.868	219.111	0	59202.8	0.00875735
Choline	C5 H13 N O	62-49-7	Organonitrogen compounds	有机氮化合物	103.1	0.748	103.1	-4	9.38858e+06	1.38877
2-Amino-1,3,4-octadecanetriol	C18 H39 N O3	554-62-1	Organonitrogen compounds	有机氮化合物	317.293	10.378	317.293	1	1.07327e+06	0.158759
DL-Carnitine	C7 H15 N O3	406-76-8	Organonitrogen compounds	有机氮化合物	161.105	0.765	161.105	0	290491	0.0429698
N-Lauryldiethanolamine	C16 H35 N O2	1541-67-9	Organonitrogen compounds	有机氮化合物	273.266	10.327	273.267	0	1.69554e+06	0.250806
(9aR,9bS)-9a-Hydroxy-6,9-dimethyl-3-methylene-3,3a,4,5,9a,9b-hexahydroazuleno[4,5-b]furan-2,7-dione	C15 H16 O4	NA	Lactones	内酯	260.105	7.86	260.105	0	39434.7	0.00583322
Indole	C8 H7 N	120-72-9	Indoles and derivatives	吲哚及其衍生物	117.058	5.414	117.058	-1	196945	0.0291323
4-Indolecarbaldehyde	C9 H7 N O	1047-86-6	Indoles and derivatives	吲哚及其衍生物	145.053	4.698	145.053	-1	29847.2	0.00441503
Indole-3-acrylic acid	C11 H9 N O2	1204-06-4	Indoles and derivatives	吲哚及其衍生物	187.063	4.53	187.063	0	728815	0.107807
Indole-3-acetic acid	C10 H9 N O2	87-51-4	Indoles and derivatives	吲哚及其衍生物	175.063	6.207	175.063	0	212707	0.0314638
Adenine	C5 H5 N5	73-24-5	Imidazopyrimidines	咪唑嘧啶类	135.055	0.848	135.054	-1	505443	0.0747657
Guanine	C5 H5 N5 O	73-40-5	Imidazopyrimidines	咪唑嘧啶类	151.05	1.344	151.049	0	71679.1	0.0106029
2-(Diethoxymethyl)furan	C9 H14 O3	13529-27-6	Heteroaromatic compounds	杂环化合物	170.094	4.564	170.094	0	1.00532e+06	0.148708
Cantharidin	C10 H12 O4	56-25-7	Furofurans	呋喃	196.074	7.111	196.074	0	735081	0.108734
Eriodictyol	C15 H12 O6	552-58-9	Flavonoids	黄酮类化合物	288.063	12.86	288.063	0	6.62447e+06	0.9799
(1ξ)-1,5-Anhydro-1-[2-(3,4-dihydroxyphenyl)-5,7-dihydroxy-4-oxo-4H-chromen-8-yl]-D-galactitol	C21 H20 O11	NA	Flavonoids	黄酮类化合物	448.1	6.123	448.101	0	3.89309e+06	0.57587
1,5-Anhydro-1-[5,7-dihydroxy-2-(4-hydroxyphenyl)-4-oxo-4H-chromen-6-yl]hexitol	C21 H20 O10	NA	Flavonoids	黄酮类化合物	432.105	6.571	432.106	0	2.92572e+06	0.432776
7-Hydroxy-2-(4-hydroxyphenyl)-4-oxo-3,4-dihydro-2H-chromen-5-yl β-D-glucopyranoside	C21 H22 O10	NA	Flavonoids	黄酮类化合物	434.121	8.137	434.121	0	198262	0.0293272
Nictoflorin	C27 H30 O15	17650-84-9	Flavonoids	黄酮类化合物	594.159	6.73	594.158	0	59623.4	0.00881956
Morin	C15 H10 O7	480-16-0	Flavonoids	黄酮类化合物	302.042	5.673	302.043	1	73129.7	0.0108174
Corymboside	C26 H28 O14	NA	Flavonoids	黄酮类化合物	564.148	6.26	564.148	0	32484.4	0.00480514
Hesperetin	C16 H14 O6	NA	Flavonoids	黄酮类化合物	302.079	12.371	302.079	0	8.84561e+06	1.30845
9-Oxo-10(E),12(E)-octadecadienoic acid	C18 H30 O3	54232-58-5	Fatty Acyls	脂肪酰类脂质化合物	294.219	13.575	294.219	0	162001	0.0239633
α-Eleostearic acid	C18 H30 O2	506-23-0	Fatty Acyls	脂肪酰类脂质化合物	278.224	13.156	278.225	0	449677	0.0665168
9S,13R-12-Oxophytodienoic acid	C18 H28 O3	NA	Fatty Acyls	脂肪酰类脂质化合物	292.203	9.598	292.204	1	223780	0.0331018
Oleamide	C18 H35 N O	301-02-0	Fatty Acyls	脂肪酰类脂质化合物	281.272	16.94	281.272	0	33160.9	0.0049052
Bis(4-ethylbenzylidene)sorbitol	C24 H30 O6	79072-96-1	Dioxanes	二恶烷	414.204	11.933	414.204	0	118836	0.0175784
Cytosine	C4 H5 N3 O	71-30-7	Diazines	二嗪	111.044	0.832	111.043	-3	176470	0.0261036
Alternariol	C14 H10 O5	641-38-3	Coumarins and derivatives	香豆素及其衍生物	258.053	11.314	258.053	0	702592	0.103928
Coumarin	C9 H6 O2	91-64-5	Coumarins and derivatives	香豆素及其衍生物	146.037	5.421	146.037	0	297342	0.0439832
Esculetin	C9 H6 O4	305-01-1	Coumarins and derivatives	香豆素及其衍生物	178.027	5.696	178.027	0	52330	0.00774072
Alternariolmethylether	C15 H12 O5	23452-05-3	Coumarins and derivatives	香豆素及其衍生物	272.068	12.59	272.068	1	1.81166e+07	2.67984
4-Methylumbelliferone	C10 H8 O3	90-33-5	Coumarins and derivatives	香豆素及其衍生物	176.047	7.891	176.047	0	98170.5	0.0145215
4-Methylumbelliferyl-α-D-glucopyranoside	C16 H18 O8	17833-43-1	Coumarins and derivatives	香豆素及其衍生物	338.1	5.414	338.1	1	215474	0.0318732
hymecromone	C10 H8 O3	90-33-5	Coumarins and derivatives	香豆素及其衍生物	176.047	5.773	176.047	0	1.17989e+06	0.174531
Isoferulic acid	C10 H10 O4	537-73-5	Cinnamic acids and derivatives	肉桂酸及其衍生物	194.058	5.773	194.058	0	2.01688e+06	0.298339
Methyl cinnamate	C10 H10 O2	103-26-4	Cinnamic acids and derivatives	肉桂酸及其衍生物	162.068	6.514	162.068	0	33909.1	0.00501588
4-Coumaric acid	C9 H8 O3	7400-08-0	Cinnamic acids and derivatives	肉桂酸及其衍生物	164.047	6.615	164.047	0	77703.7	0.011494
4-Methoxycinnamic acid	C10 H10 O3	830-09-1	Cinnamic acids and derivatives	肉桂酸及其衍生物	178.063	7.106	178.063	0	746218	0.110381
DL-Stachydrine	C7 H13 N O2	4136-37-2	Carboxylic acids and derivatives	羧酸及其衍生物	143.095	0.823	143.095	0	1.28592e+06	0.190215
Pipecolic acid	C6 H11 N O2	4043-87-2	Carboxylic acids and derivatives	羧酸及其衍生物	129.079	0.853	129.079	-1	41478.5	0.00613556
L-Pyroglutamic acid	C5 H7 N O3	98-79-3	Carboxylic acids and derivatives	羧酸及其衍生物	129.043	1.162	129.043	-1	1.29134e+06	0.191016
Phenylacetylglycine	C10 H11 N O3	500-98-1	Carboxylic acids and derivatives	羧酸及其衍生物	193.074	3.526	193.074	0	251587	0.037215
4-Guanidinobutyric acid	C5 H11 N3 O2	463-00-3	Carboxylic acids and derivatives	羧酸及其衍生物	145.085	0.849	145.085	0	230094	0.0340357
Leucine	C6 H13 N O2	61-90-5	Carboxylic acids and derivatives	羧酸及其衍生物	131.095	1.376	131.095	-1	293704	0.0434451
Proline	C5 H9 N O2	147-85-3	Carboxylic acids and derivatives	羧酸及其衍生物	115.064	0.802	115.063	-2	563156	0.0833027
L-(+)-Arginine	C6 H14 N4 O2	74-79-3	Carboxylic acids and derivatives	羧酸及其衍生物	174.112	0.713	174.112	0	327055	0.0483784
L-Phenylalanine	C9 H11 N O2	63-91-2	Carboxylic acids and derivatives	羧酸及其衍生物	165.079	2.252	165.079	-1	304594	0.045056
Betaine	C5 H11 N O2	107-43-7	Carboxylic acids and derivatives	羧酸及其衍生物	117.079	0.785	117.079	-2	7.05268e+06	1.04324
L-Tyrosine	C9 H11 N O3	60-18-4	Carboxylic acids and derivatives	羧酸及其衍生物	181.074	1.232	181.074	-1	73321.4	0.0108458
3-Bromo-4-methoxy-N-[(3-oxo-1-piperazinyl)carbonothioyl]benzamide	C13 H14 Br N3 O3 S	NA	Carboxylic acids and derivatives	羧酸及其衍生物	370.994	11.58	370.994	0	1.02546e+06	0.151687
(2R)-5-Methoxy-2-methyl-2,3,8,9-tetrahydro-4H-furo[2,3-H]chromen-4-one	C13 H14 O4	NA	Benzopyrans	苯并吡喃	234.089	7.095	234.089	0	58324.6	0.00862745
Bellidifolin	C14 H10 O6	2798-25-6	Benzopyrans	苯并吡喃	274.047	11.586	274.048	0	9.42894e+06	1.39474
Phthalic anhydride	C8 H4 O3	85-44-9	Benzofurans	苯呋喃类	148.016	14.044	148.016	0	6.60693e+06	0.977305
3,4-Dimethylbenzoic acid	C9 H10 O2	619-04-5	Benzene and substituted derivatives	苯及其取代衍生物	150.068	7.105	150.068	0	277252	0.0410115
4-Methoxybenzaldehyde	C8 H8 O2	123-11-5	Benzene and substituted derivatives	苯及其取代衍生物	136.052	5.42	136.052	0	105471	0.0156014
Tapentadol	C14 H23 N O	175591-23-8	Benzene and substituted derivatives	苯及其取代衍生物	221.178	8.18	221.178	0	127753	0.0188973
3',4'-Dihydroxyphenylacetone	C9 H10 O3	2503-44-8	Benzene and substituted derivatives	苯及其取代衍生物	166.063	5.415	166.063	0	3.57183e+06	0.528349
4-Phenylbutyric acid	C10 H12 O2	1821-12-1	Benzene and substituted derivatives	苯及其取代衍生物	164.084	4.239	164.084	0	228677	0.0338263
Dibutyl phthalate	C16 H22 O4	84-74-2	Benzene and substituted derivatives	苯及其取代衍生物	278.152	14.044	278.152	0	4.70012e+06	0.695247
N-(2,4-Dimethylphenyl)formamide	C9 H11 N O	60397-77-5	Benzene and substituted derivatives	苯及其取代衍生物	149.084	0.851	149.084	-1	210071	0.031074
2C-N	C10 H14 N2 O4	261789-00-8	Benzene and substituted derivatives	苯及其取代衍生物	226.095	2.495	226.095	0	100360	0.0148454
Alizarin	C14 H8 O4	72-48-0	Anthracenes	蒽类	240.042	7.611	240.042	1	334404	0.0494655
2-AMINO-3-(2-CHLORO-PHENYL)-PROPIONIC ACID	C9H10ClNO2	14091-11-3	内标	内标	199.04	4.504	199.04	0	6.76035e+06	1

## Sheet: Negative ion mode
Name	Formula	CAS_num	Class	中文分类参考	Molecular Weight(实际值)	RT [min]	Molecular Weight(理论值)	△ppm	Area: 200102-516001-leizhuhua-N.raw (F1)	Relative concentration（ug/ml）
6-O-[(2E)-3-Phenyl-2-propenoyl]-1-O-(3,4,5-trihydroxybenzoyl)-β-D-glucopyranose	C22 H22 O11	NA	Tannins	单宁	462.117	6.208	462.116	-2	293589	1.02096
Uridine	C9 H12 N2 O6	58-96-8	Pyrimidine nucleosides	嘧啶核苷	244.07	1.155	244.07	-1	315094	1.09574
Guanosine	C10 H13 N5 O5	118-00-3	Purine nucleosides	嘌呤核苷	283.092	1.339	283.092	-1	45106.8	0.156859
Mussaenosidic acid	C16 H24 O10	NA	Prenol lipids	异戊烯醇酯类脂质化合物	376.138	4.855	376.137	-1	8.784e+06	30.5465
18-β-Glycyrrhetinic acid	C30 H46 O4	471-53-4	Prenol lipids	异戊烯醇酯类脂质化合物	470.34	12.407	470.34	-1	224469	0.780593
Shanzhiside methyl ester	C17 H26 O11	NA	Prenol lipids	异戊烯醇酯类脂质化合物	406.148	4.496	406.148	-1	1.44947e+06	5.04053
(1S,4aS,7S,7aS)-7-Hydroxy-1-{[6-O-(4-hydroxybenzoyl)-β-D-glucopyranosyl]oxy}-7-methyl-1,4a,5,6,7,7a-hexahydrocyclopenta[c]pyran-4-carboxylic acid	C23 H28 O12	NA	Prenol lipids	异戊烯醇酯类脂质化合物	496.159	7.102	496.158	-2	1.4255e+07	49.5718
2-Hydroxy-4-(4-hydroxyphenyl)butanoic acid	C10 H12 O4	NA	Phenols	酚类	196.073	6.197	196.074	1	53746	0.186902
Metaproterenol	C11 H17 N O3	NA	Phenols	酚类	211.121	7.506	211.121	1	252398	0.877716
(5R,6R)-1,5-Dibenzyl-6-hydroxy-2,4-bis(4-hydroxy-3-methoxybenzyl)-1,2,4-triazepan-3-one	C34 H37 N3 O6	NA	Phenols	酚类	583.269	9.244	583.268	0	1.80526e+06	6.27782
δ-Gluconic acid δ-lactone	C6 H10 O6	90-80-2	Organooxygen compounds	有机氧化合物	178.047	0.845	178.048	2	164214	0.571057
2-(4-Methyl-3-cyclohexen-1-yl)-2-propanyl 6-O-(6-deoxy-α-L-mannopyranosyl)-β-D-glucopyranoside	C22 H38 O10	NA	Organooxygen compounds	有机氧化合物	462.248	7.666	462.247	-2	109266	0.379973
α,α-Trehalose	C12 H22 O11	99-20-7	Organooxygen compounds	有机氧化合物	342.117	0.793	342.116	-1	4.26813e+07	148.425
Bioside	C20 H30 O12	NA	Organooxygen compounds	有机氧化合物	462.175	6.124	462.174	-1	190643	0.662963
D-(+)-Arabitol	C5 H12 O5	488-82-4	Organooxygen compounds	有机氧化合物	152.068	0.779	152.068	3	1.07238e+06	3.72922
D-(-)-Salicin	C13 H18 O7	138-52-3	Organooxygen compounds	有机氧化合物	286.106	4.491	286.105	-1	357101	1.24182
D-(-)-Arabinose	C5 H10 O5	10323-20-3	Organooxygen compounds	有机氧化合物	150.052	0.843	150.053	4	228550	0.794785
D-(-)-Fructose	C6 H12 O6	57-48-7	Organooxygen compounds	有机氧化合物	180.063	0.778	180.063	1	2.75292e+06	9.57331
L-Iditol	C6 H14 O6	488-45-9	Organooxygen compounds	有机氧化合物	182.079	0.772	182.079	2	2.49435e+06	8.67412
Sweroside	C16 H22 O9	14215-86-2	Organooxygen compounds	有机氧化合物	358.127	5.842	358.126	0	1.02729e+07	35.724
brartemicin	C28 H34 O17	NA	Organooxygen compounds	有机氧化合物	642.181	7.719	642.18	0	1.8202e+06	6.32976
alpha-tyvelopyranosyl-(1->3)-alpha-D-mannopyranose	C12 H22 O9	NA	Organooxygen compounds	有机氧化合物	310.127	2.085	310.126	0	8.94461e+06	31.105
Lariciresinol 4-O-glucoside	C26 H34 O11	NA	Lignans, neolignans and related compounds	木脂素、新木脂素及相关化合物	522.211	6.58	522.21	-1	34698.3	0.120664
4-[(2S,3R,4S)-4-Hydroxy-4-(4-hydroxy-3-methoxybenzyl)-3-(hydroxymethyl)tetrahydro-2-furanyl]-2-methoxyphenyl β-D-glucopyranoside	C26 H34 O12	NA	Lignans, neolignans and related compounds	木脂素、新木脂素及相关化合物	538.206	5.74	538.205	-2	280085	0.973999
Naringenin	C15 H12 O5	480-41-1	Flavonoids	黄酮类化合物	272.069	9.756	272.068	-1	202901	0.705592
Rutin	C27 H30 O16	153-18-4	Flavonoids	黄酮类化合物	610.155	6.481	610.153	-2	62962.4	0.218952
Eriodictyol	C15 H12 O6	552-58-9	Flavonoids	黄酮类化合物	288.064	7.792	288.063	-1	78671.4	0.273581
Azelaic acid	C9 H16 O4	123-99-9	Fatty Acyls	脂肪酰类脂质化合物	188.104	7.514	188.105	2	988874	3.43882
(15Z)-9,12,13-Trihydroxy-15-octadecenoic acid	C18 H34 O5	NA	Fatty Acyls	脂肪酰类脂质化合物	330.241	9.947	330.241	-1	2.73139e+06	9.49845
3-tert-Butyladipic acid	C10 H18 O4	10347-88-3	Fatty Acyls	脂肪酰类脂质化合物	202.12	5.873	202.121	1	383031	1.33199
Dibutyl 4-acetyl-4-methylheptanedioate	C18 H32 O5	6630-77-9	Fatty Acyls	脂肪酰类脂质化合物	328.225	9.595	328.225	0	1.74266e+06	6.06011
2-{[4-(4-Fluorophenyl)-6-(trifluoromethyl)-2-pyrimidinyl]sulfanyl}-N-(2-phenylethyl)acetamide	C21 H17 F4 N3 O S	NA	Diazines	二氮杂苯	435.103	7.401	435.103	0	2.69425e+07	93.6928
3-Coumaric acid	C9 H8 O3	588-30-7	Cinnamic acids and derivatives	肉桂酸及其衍生物	164.047	6.616	164.047	3	218952	0.76141
Caffeic acid	C9 H8 O4	331-39-5	Cinnamic acids and derivatives	肉桂酸及其衍生物	180.042	5.758	180.042	3	141580	0.492347
Ferulic acid	C10 H10 O4	537-98-4	Cinnamic acids and derivatives	肉桂酸及其衍生物	194.058	6.934	194.058	1	44610.4	0.155133
Glutaric acid	C5 H8 O4	110-94-1	Carboxylic acids and derivatives	羧酸及其衍生物	132.043	16.903	132.042	0	1.04619e+06	3.63814
1-(Carboxymethyl)cyclohexanecarboxylic acid	C9 H14 O4	67950-95-2	Carboxylic acids and derivatives	羧酸及其衍生物	186.089	5.578	186.089	2	37619.1	0.130821
N-Acetyl-L-glutamic acid	C7 H11 N O5	1188-37-0	Carboxylic acids and derivatives	羧酸及其衍生物	189.064	17.724	189.064	0	1.23141e+06	4.28223
Swertipunicoside	C33 H26 O17	137570-21-9	Benzopyrans	苯并吡喃类	694.119	9.428	694.117	0	1.185e+06	4.12086
Bellidifolin	C14 H10 O6	2798-25-6	Benzopyrans	苯并吡喃类	274.048	11.583	274.048	0	25524839	88.7629
2,4-Dihydroxybenzoic acid	C7 H6 O4	89-86-1	Benzene and substituted derivatives	苯及其取代衍生物	154.026	6.009	154.027	4	315819	1.09826
2,2'-Methylenebis(4-methyl-6-tert-butylphenol)	C23 H32 O2	119-47-1	Benzene and substituted derivatives	苯及其取代衍生物	340.241	16.77	340.24	-1	4.19739e+06	14.5965
Gentisic acid	C7 H6 O4	490-79-9	Benzene and substituted derivatives	苯及其取代衍生物	154.026	5.479	154.027	4	291045	1.01211
2-[2-(5-Chloro-2-methoxyanilino)-2-oxoethoxy]acetic acid	C11 H12 Cl N O5	NA	Benzene and substituted derivatives	苯及其取代衍生物	273.04	7.399	273.04	0	153992	0.535508
Amarogentin	C29 H30 O13	21018-84-8	Benzene and substituted derivatives	苯及其取代衍生物	586.17	7.9	586.169	0	5.89931e+06	20.5149
OCTOXYNOL-2	C18 H30 O3	2315-61-9	Benzene and substituted derivatives	苯及其取代衍生物	294.22	12.577	294.219	0	1.37675e+06	4.78765
Swertiamarin	C16H22O10	17388-39-5	獐牙菜苦苷	獐牙菜苦苷	374.122	5.414	374.121	2	7.79464e+07	271.06
2-AMINO-3-(2-CHLORO-PHENYL)-PROPIONIC ACID	C9H10ClNO2	14091-11-3	内标	内标	199.04	4.51	199.04	0	287562	1

## Sheet: Sheet1
序号	Name	Formula	CAS_num	Class	中文分类参考	Molecular Weight(实际值)	RT [min]	Molecular Weight(理论值)	△ppm	Area: 200102-516001-leizhuhua-N.raw (F1)	相对浓度（ug/ml）
1	Mussaenosidic acid	C16 H24 O10	NA	Prenol lipids	异戊烯醇酯类脂质化合物	376.138	4.855	376.137	-1	8.784e+06	30.5465
2	(1S,4aS,7S,7aS)-7-Hydroxy-1-{[6-O-(4-hydroxybenzoyl)-β-D-glucopyranosyl]oxy}-7-methyl-1,4a,5,6,7,7a-hexahydrocyclopenta[c]pyran-4-carboxylic acid	C23 H28 O12	NA	Prenol lipids	异戊烯醇酯类脂质化合物	496.159	7.102	496.158	-2	1.4255e+07	49.5718
3	α,α-Trehalose	C12 H22 O11	99-20-7	Organooxygen compounds	有机氧化合物	342.117	0.793	342.116	-1	4.26813e+07	148.425
4	Sweroside	C16 H22 O9	14215-86-2	Organooxygen compounds	有机氧化合物	358.127	5.842	358.126	0	1.02729e+07	35.724
5	2-{[4-(4-Fluorophenyl)-6-(trifluoromethyl)-2-pyrimidinyl]sulfanyl}-N-(2-phenylethyl)acetamide	C21 H17 F4 N3 O S	NA	Diazines	二氮杂苯	435.103	7.401	435.103	0	2.69425e+07	93.6928
6	Bellidifolin	C14 H10 O6	2798-25-6	Benzopyrans	苯并吡喃类	274.048	11.583	274.048	0	25524839	88.7629
7	Amarogentin	C29 H30 O13	21018-84-8	Benzene and substituted derivatives	苯及其取代衍生物	586.17	7.9	586.169	0	5.89931e+06	20.5149
8	Swertiamarin	C16H22O10	17388-39-5	獐牙菜苦苷	獐牙菜苦苷	374.122	5.414	374.121	2	7.79464e+07	271.06
